# Supplementary material for: Interfused semiconductor nanocrystals: brilliant blue photoluminescence and electroluminescence
Source: Royal Society of Chemistry journal article supplement (doi:10.1039/b509196a), 2005-01-01
Supplement: b509196a.pdf [file b509196a.pdf]

Electronic Supplementary Information

Fig. S1 XRD pattern of the CdSe//ZnS interfused nanocrystal and the CdSe core

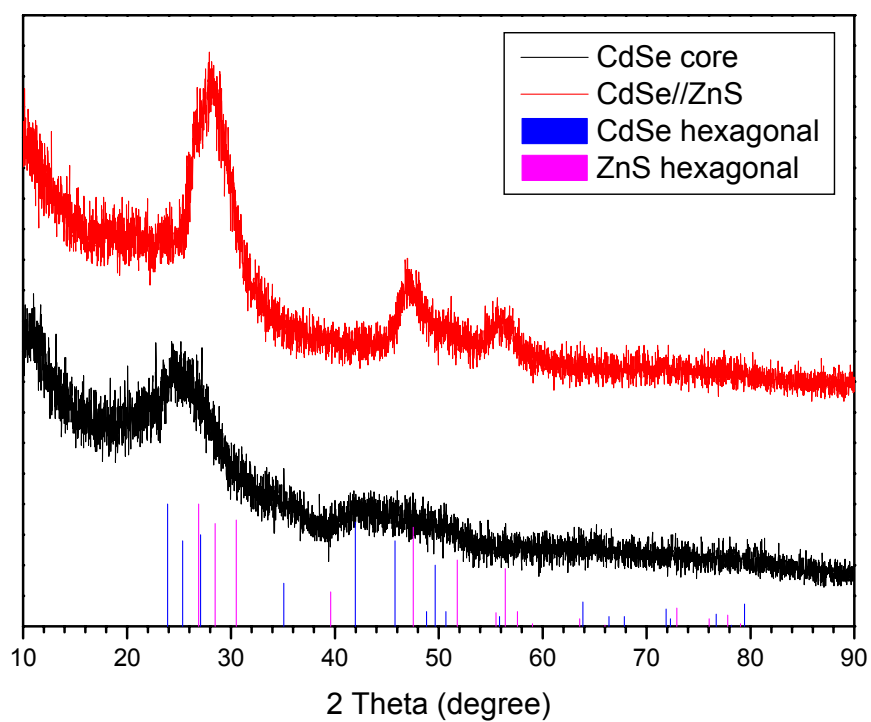

**Fig. S2 PL spectra of the interfused nanocrystals and their respective cores**

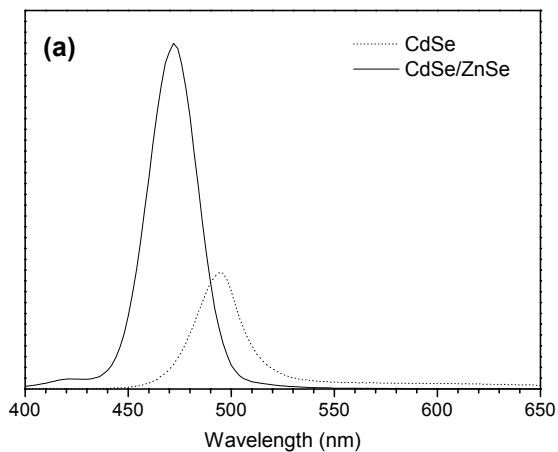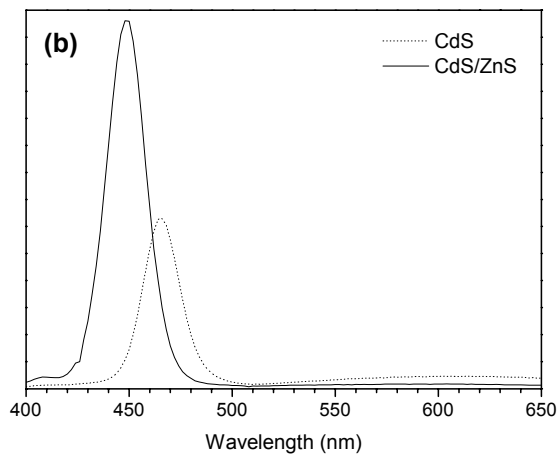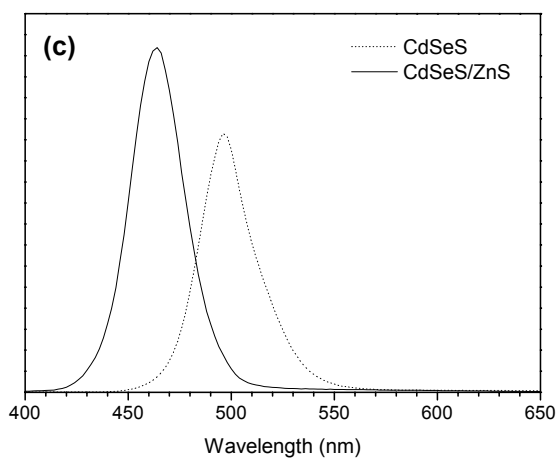

**(a) PL of CdSe and CdSe//ZnSe**

**(b) PL of CdS and CdS//ZnS**

**(c) PL of CdSeS and CdSeS//ZnS**

**The preparation of cores and interfused nanocrystals was done by the same synthetic procedures introduced in the paper.**
